# Supplementary material for: Comprehensive Analysis of MICALL2 Reveals Its Potential Roles in EGFR Stabilization and Ovarian Cancer Cell Invasion
Source: MDPI journal article supplement (doi:10.3390/ijms25010518), 2023-12-30
Supplement: s1 [file s1]

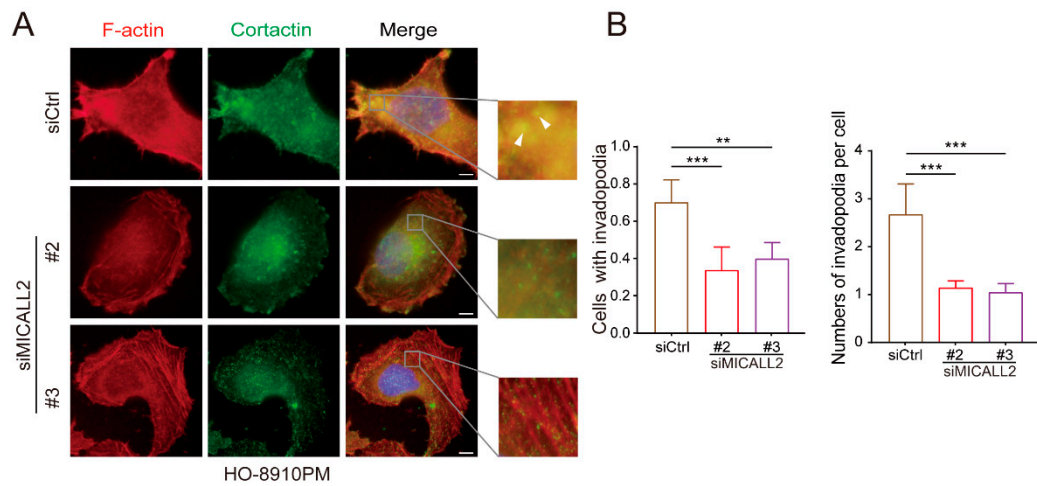

**Figure S1 Effect of siMICALL2 on the invadopodia formation of HO-8910PM cells.** (A) After transfection with siRNA and siMICALL2, HO-8910PM cells were stained with phalloidin (red), DAPI (blue), and cortactin (green). (B) Quantification of the percentage of cells with invadopodia and the number of invadopodia per cell. Scale: 2  $\mu$ m. \*\* $P$ <0.01, \*\*\* $P$ <0.001.

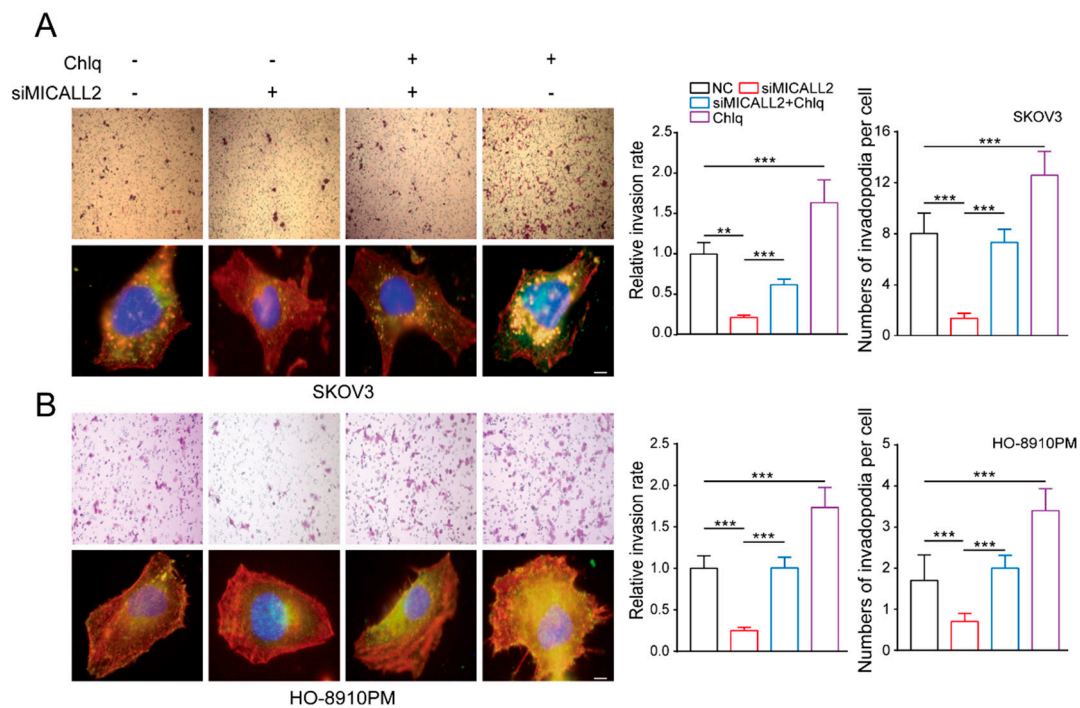

**Figure S2 Effect of autophagy on the invasive ability of ovarian cancer cells.** After the silencing of MICALL2, SKOV3 (A) and HO-8910PM cells (B) were pre-treated with Chlq (autophagy inhibitor). Subsequently, the invasive ability of cells and the number of invadopodia extensions in cells were determined. Scale: 2  $\mu$ m. \*\*\* $P$ <0.001.

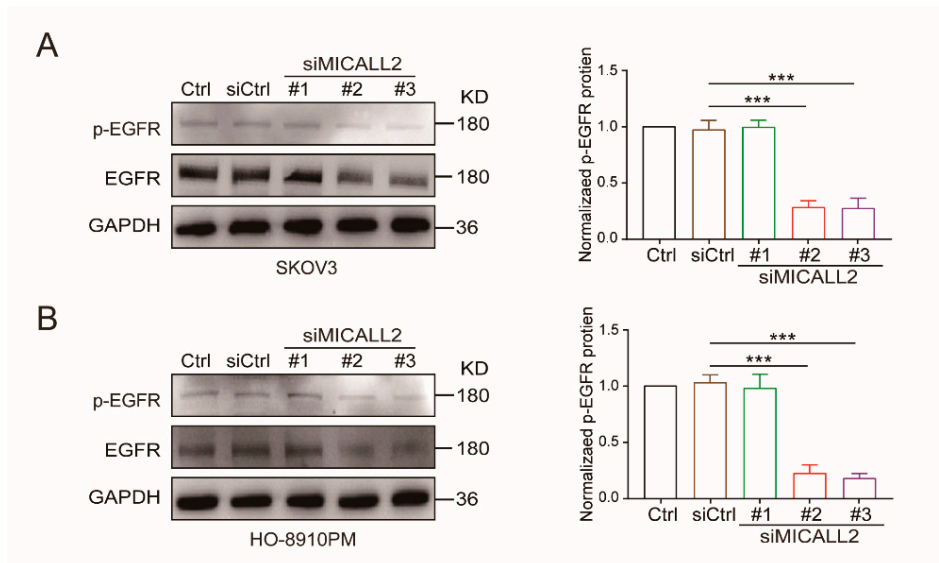

**Figure S3 Effect of siMICALL2 on p-EGFR expression.** (A, B) SKOV3 (A) and HO-8910PM (B) cells were transfected with control siRNA or siMICALL2. Subsequently, the levels of p-EGFR were detected by western blotting. \*\*\* $P < 0.001$ .
